# Supplementary material for: Reproductive and Obstetric Outcomes after UAE, HIFU, and TFA of Uterine Fibroids: Systematic Review and Meta-Analysis
Source: MDPI journal article supplement (doi:10.3390/ijerph20054480), 2023-03-02
Supplement: s1 [file s1]

**Table S1.** Risk of bias in included non-randomized studies.

| Study, Year                               | Selection of Participants | Classification of Intervention | Measurement of Outcome | Selection of the Reported Results | Missing Data | Overall  |
|-------------------------------------------|---------------------------|--------------------------------|------------------------|-----------------------------------|--------------|----------|
| Torre et al., <sup>37</sup> 2013          | Mild                      | Mild                           | Mild                   | Mild                              | Mild         | Mild     |
| Torre et al., <sup>26</sup> 2016          | Mild                      | Mild                           | Mild                   | Mild                              | Mild         | Mild     |
| Serres-Cousine et al., <sup>38</sup> 2021 | Moderate                  | Mild                           | Moderate               | Moderate                          | Moderate     | Moderate |
| McLucas, <sup>39</sup> 2013               | Mild                      | Mild                           | Mild                   | Mild                              | Mild         | Mild     |
| Mara et al., <sup>40</sup> 2012           | Mild                      | Mild                           | Mild                   | Mild                              | Mild         | Mild     |
| Redecha et al., <sup>42</sup> 2012        | Mild                      | Mild                           | Mild                   | Mild                              | Mild         | Mild     |
| Zou et al., <sup>43</sup> 2017            | Mild                      | Mild                           | Mild                   | Mild                              | Mild         | Mild     |
| Wu et al., <sup>28</sup> 2020             | Moderate                  | Mild                           | Mild                   | Mild                              | Mild         | Mild     |
| Rodríguez et al., <sup>44</sup> 2021      | Mild                      | Mild                           | Mild                   | Mild                              | Mild         | Mild     |
| Qin et al., <sup>45</sup> 2012            | Mild                      | Mild                           | Mild                   | Mild                              | Mild         | Mild     |
| Liu et al., <sup>46</sup> 2018            | Mild                      | Mild                           | Mild                   | Mild                              | Mild         | Mild     |
| Li et al., <sup>47</sup> 2017             | Mild                      | Mild                           | Mild                   | Mild                              | Mild         | Mild     |
| Thiburce et al., <sup>48</sup> 2015       | Mild                      | Mild                           | Mild                   | Mild                              | Mild         | Mild     |
| Łoziński et al., <sup>27</sup> 2019       | Moderate                  | Mild                           | Mild                   | Mild                              | Mild         | Mild     |
| Verpalen et al., <sup>49</sup> 2019       | Mild                      | Mild                           | Moderate               | Moderate                          | Moderate     | Moderate |
| Mindjuk et al., <sup>50</sup> 2014        | Moderate                  | Mild                           | Moderate               | Moderate                          | Moderate     | Moderate |
| Yoon et al., <sup>51</sup> 2013           | Mild                      | Mild                           | Moderate               | Moderate                          | Mild         | Moderate |
| Froeling et al., <sup>52</sup> 2013       | Mild                      | Mild                           | Mild                   | Mild                              | Moderate     | Mild     |
| Toub, <sup>53</sup> 2017                  | Mild                      | Mild                           | Moderate               | Moderate                          | Mild         | Mild     |
| Lukes and Green, <sup>54</sup> 2020       | Mild                      | Mild                           | Mild                   | Mild                              | Mild         | Mild     |
| Garza-Leal, <sup>55</sup> 2019            | Mild                      | Mild                           | Moderate               | Moderate                          | Mild         | Mild     |
| Christoffel et al., <sup>56</sup> 2021    | Severe                    | Moderate                       | Moderate               | Severe                            | Mild         | Severe   |
| Jiang et al., <sup>57</sup> 2014          | Mild                      | Mild                           | Moderate               | Moderate                          | Mild         | Mild     |
| Brölmann et al., <sup>58</sup> 2015       | Mild                      | Mild                           | Moderate               | Moderate                          | Mild         | Mild     |

**Table S2.** Risk of bias in included randomized study.

| Study, Year                        | Randomization | Blinding of Participants | Blinding of Outcome Measurement | Missing Data | Overall |
|------------------------------------|---------------|--------------------------|---------------------------------|--------------|---------|
| Daniels et al., <sup>41</sup> 2021 | Mild          | Mild                     | Mild                            | Moderate     | Mild    |
